# Supplementary material for: Integrative Analysis of Proteome and Transcriptome Dynamics during Bacillus subtilis Spore Revival
Source: PubMed Central journal article supplement (PMC7407066; doi:10.1128/msphere.00463-20), 2020-08-05

**Supplementary Figure 3. Temporal clustering during spore germination and outgrowth.**

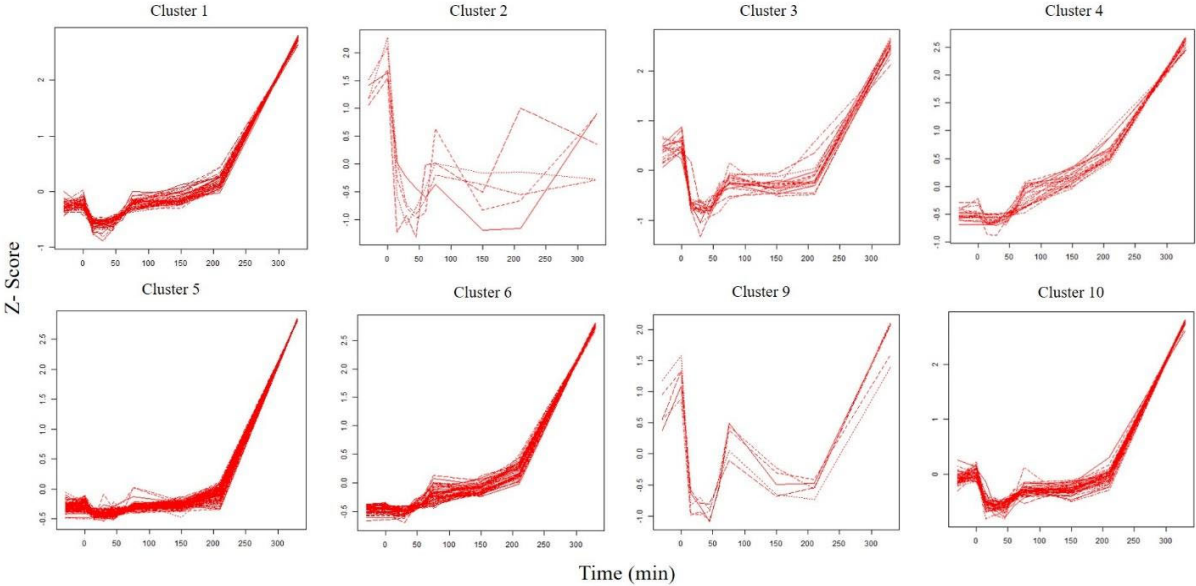

Supplement: mSphere.00463-20-sf003.pdf [file mSphere.00463-20-sf003.pdf]
