# Supplementary material for: Integrative Analysis of Proteome and Transcriptome Dynamics during Bacillus subtilis Spore Revival
Source: PubMed Central journal article supplement (PMC7407066; doi:10.1128/msphere.00463-20), 2020-08-05

Supplementary Figure 6. Continuous synthesis for proteins Ald, YoeB and AbrB throughout germination of *B. subtilis* spores.

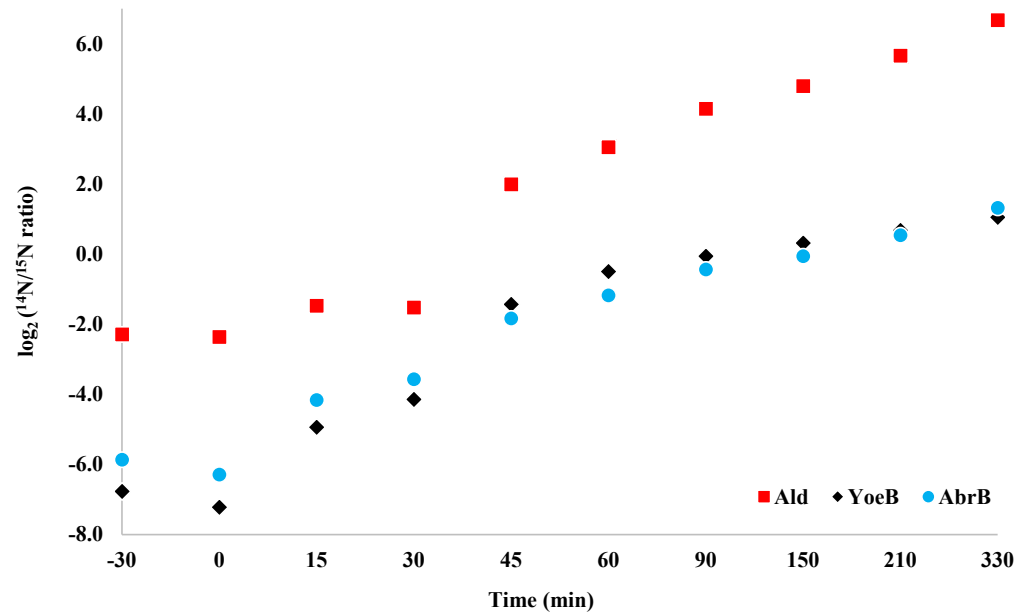

Supplement: mSphere.00463-20-sf006.pdf [file mSphere.00463-20-sf006.pdf]
